# Supplementary material
Source: PubMed Central journal article supplement (PMC11210627)
Supplement: NIHMS1991106-supplement-Curvivor-Metavivor_Supplmental.pdf [file NIHMS1991106-supplement-Curvivor-Metavivor_Supplmental.pdf]

## Supplementary Information

Do cancer survivors and metaversors have distinct needs for stress management intervention?

Retrospective analysis of a mind-body survivorship program

*Supportive Care in Cancer*

Lucy Finkelstein-Fox, PhD\*, Cayley C. Bliss, BA, Autumn W. Rasmussen, BA, Daniel L. Hall, PhD, Areej El-Jawahri, MD, Giselle K. Perez, PhD, Lara N. Traeger, PhD, Amy H. Comander, MD, Jeffrey Peppercorn, MD, MPH, Reid Anctil, BA, Elise Noonan, BA, & Elyse R. Park, PhD, MPH

\*Corresponding author: [lfinkelsteinfox@mgh.harvard.edu](mailto:lfinkelsteinfox@mgh.harvard.edu); Department of Psychiatry and Health Promotion and Resiliency Intervention Research (HPRIR) Program, Massachusetts General Hospital; Department of Psychiatry, Harvard Medical School, Boston, MA

Supplementary Figure 1. Plot of Statistically Non-Significant Curvivor-Metavivor Difference in Resilient Appreciation for Life Change Pre-Post Program

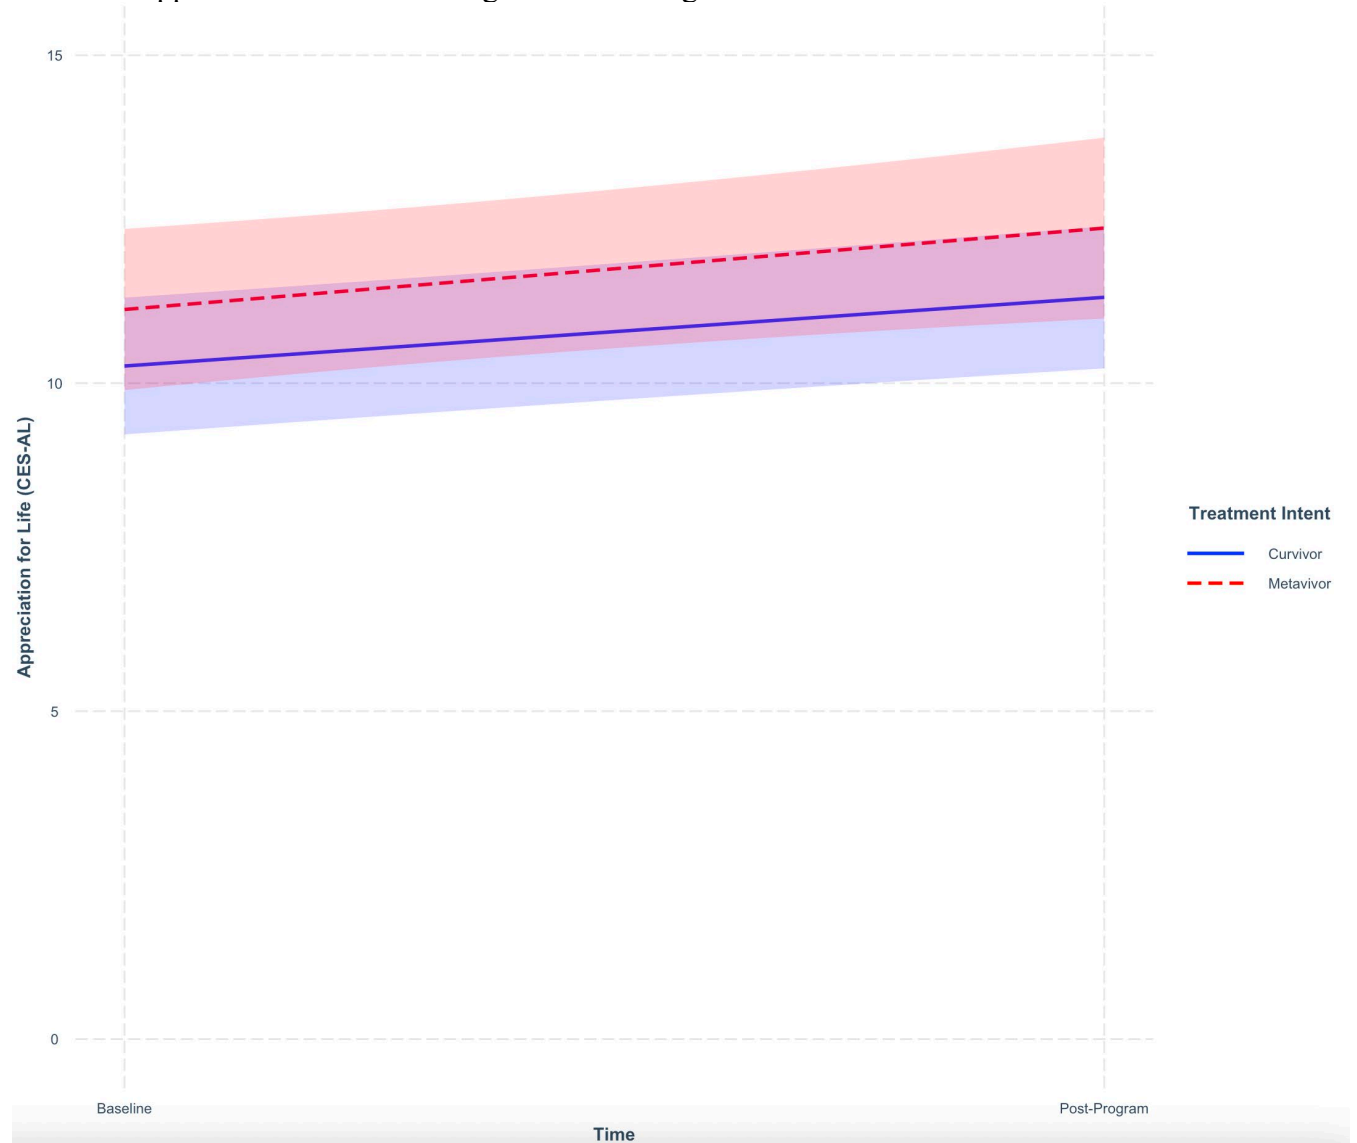

Notes. Shaded areas represent 95% confidence intervals for simple slopes. Possible scores on CES-AL subscale range from 0-15.

Supplementary Figure 2. Plot of Statistically Non-Significant Curvivor-Metavivor Difference in Resilient Health Behavior Change Pre-Post Program

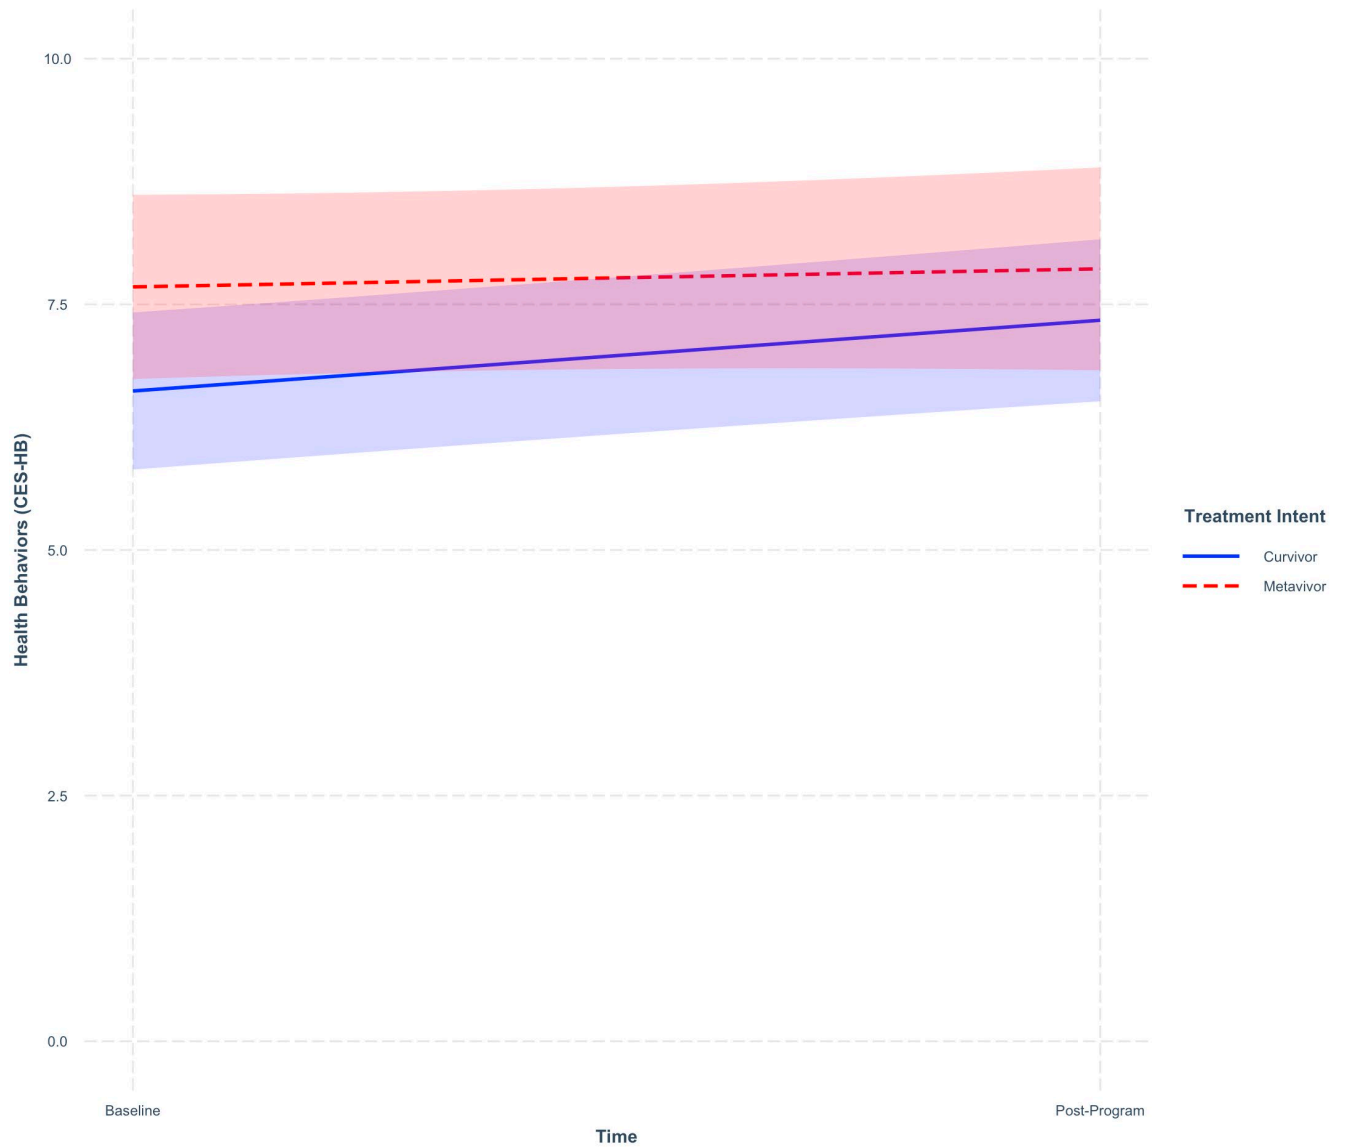

Notes. Shaded areas represent 95% confidence intervals for simple slopes. Possible scores on CES-HB subscale range from 0-10.

Supplementary Figure 3. Plot of Statistically Non -Significant Curvivor-Metavivor Difference in Resilient New Perspectives Change Pre-Post Program

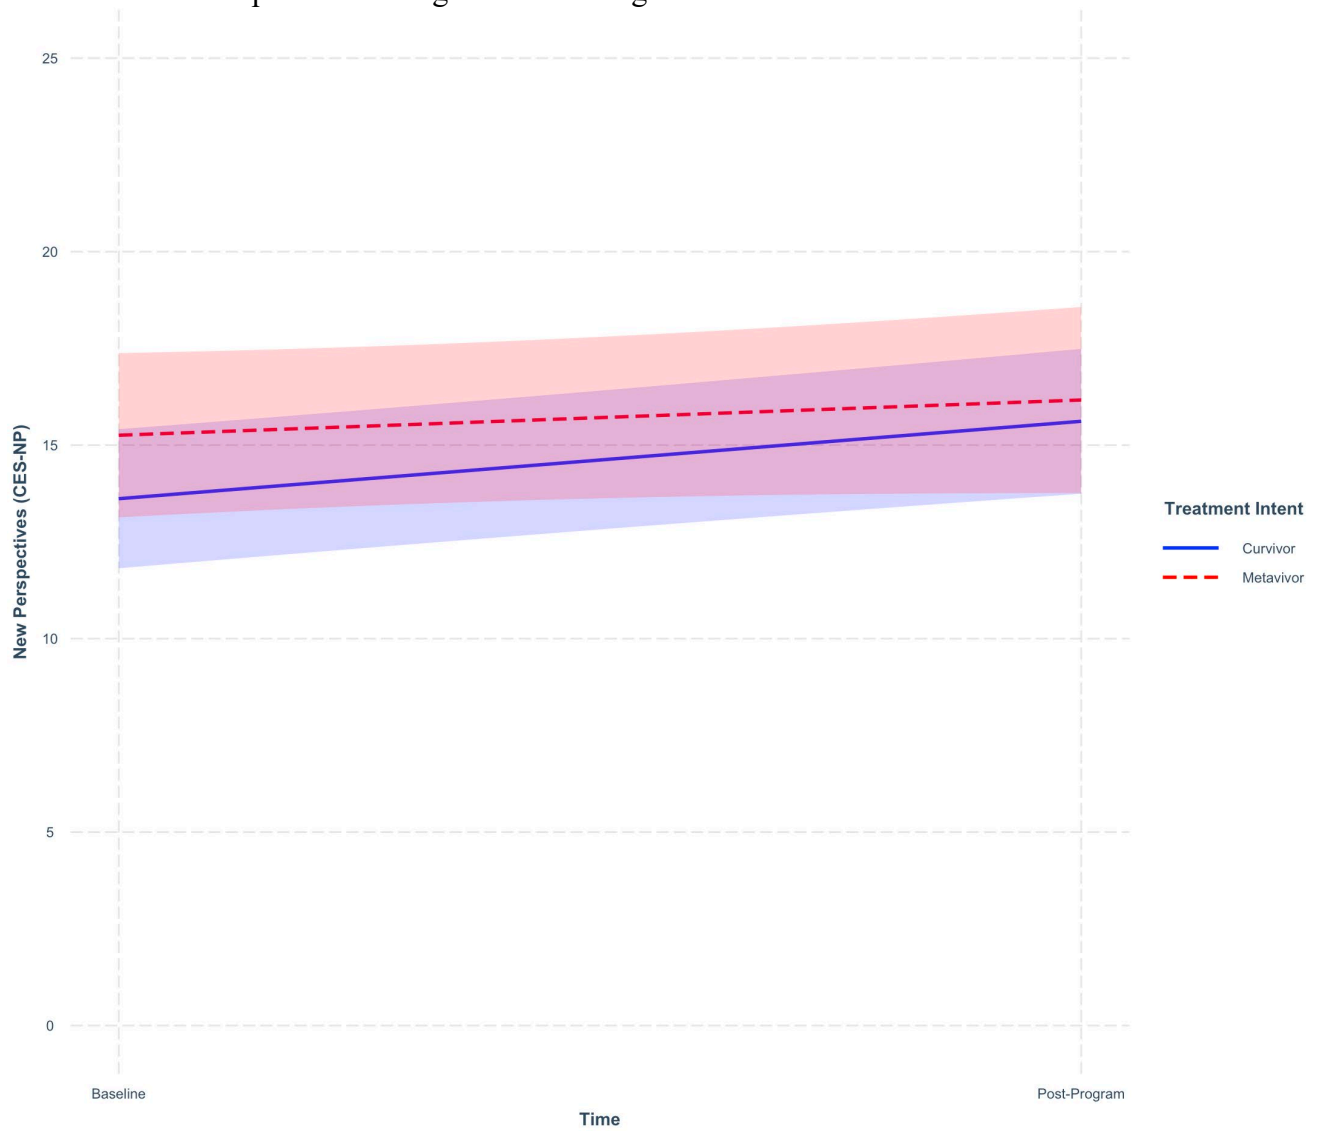

Notes. Shaded areas represent 95% confidence intervals for simple slopes. Possible scores on CES-NP subscale range from 0-25.

Supplementary Figure 4. Plot of Statistically Non-Significant Curvivor-Metavivor Difference in Resilient Personal Strength Change Pre-Post Program

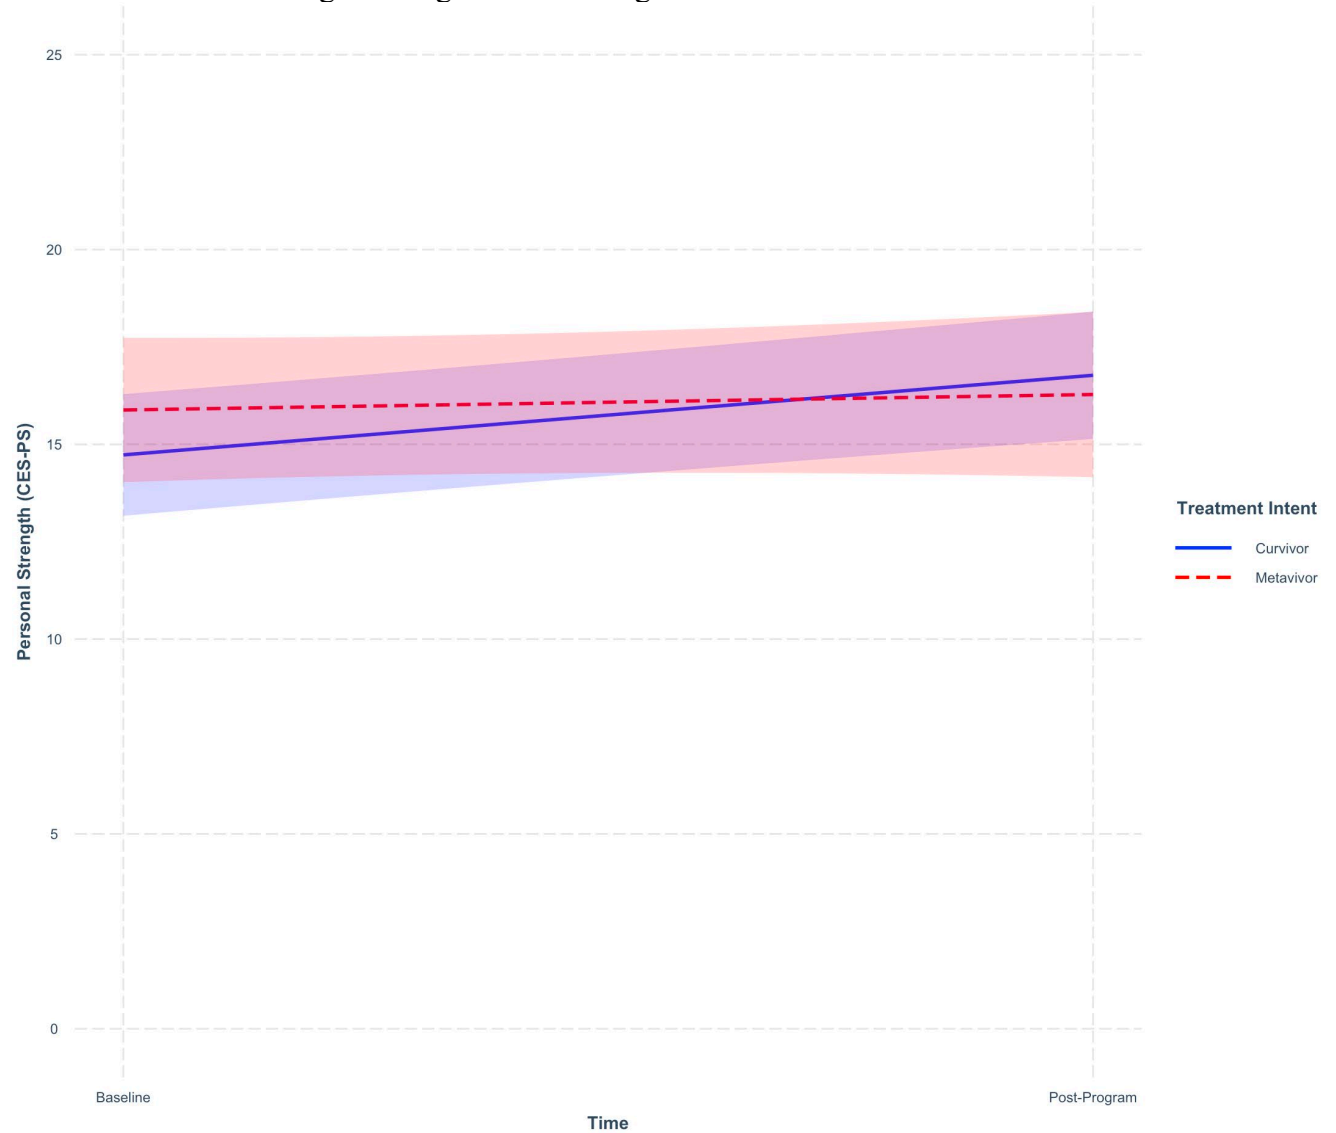

Notes. Shaded areas represent 95% confidence intervals for simple slopes. Possible scores on CES-PS subscale range from 0-25.

Supplementary Figure 5. Plot of Statistically Non-Significant Curvivor-Metavivor Difference in Resilient Relating to Others Change Pre-Post Program

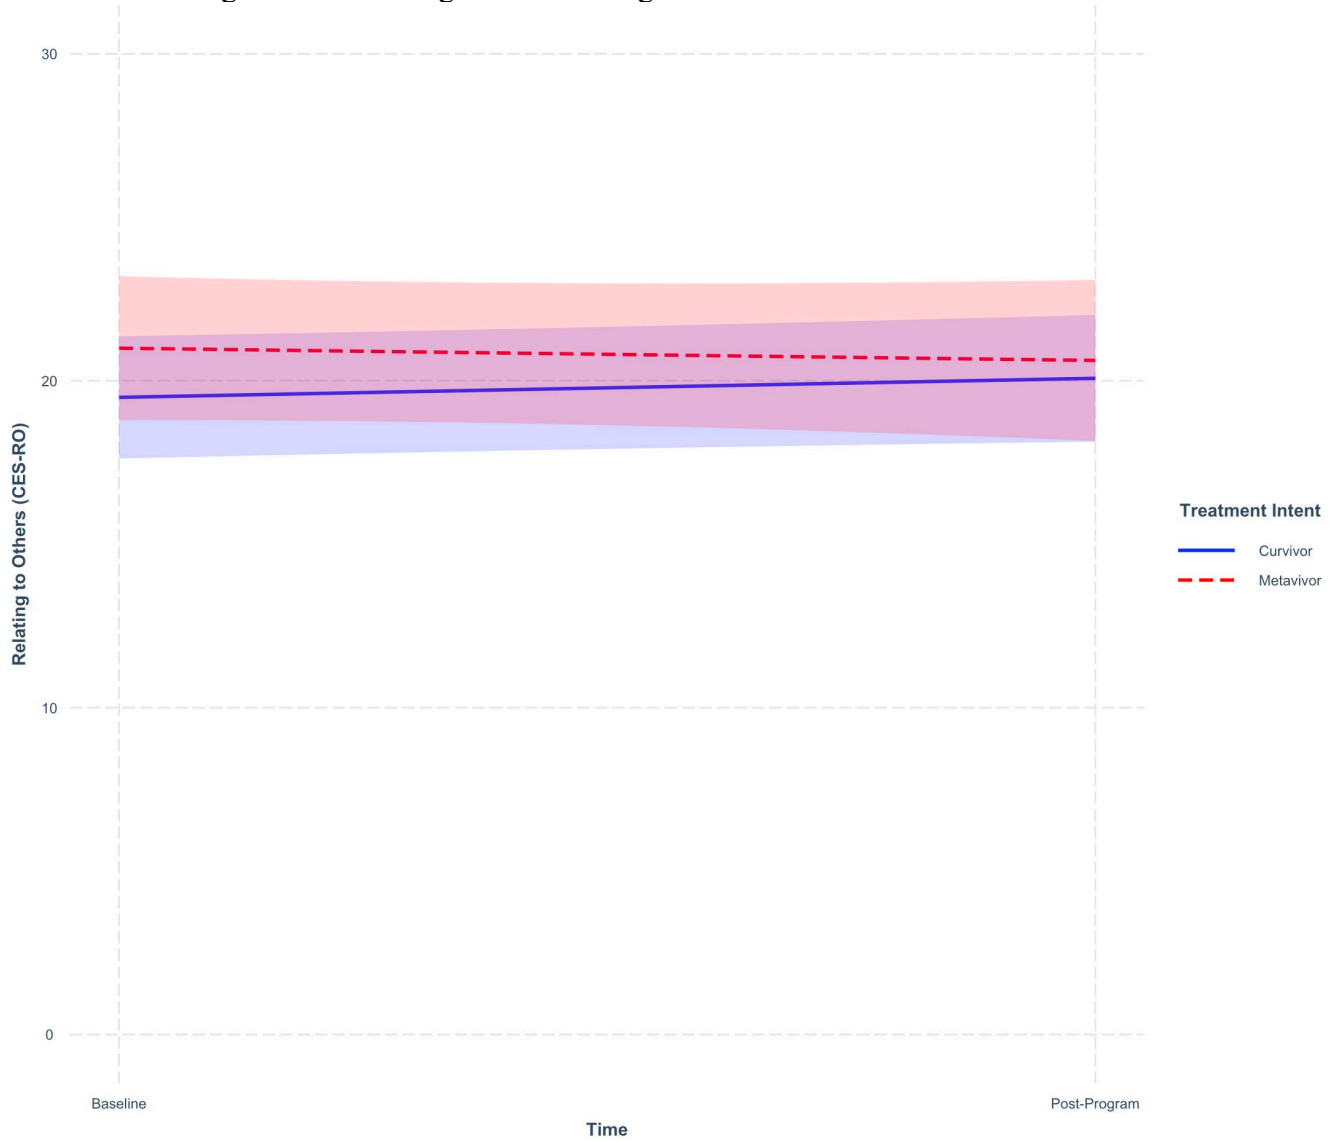

Notes. Shaded areas represent 95% confidence intervals for simple slopes. Possible scores on CES-RO subscale range from 0-30.

Supplementary Figure 6. Plot of Statistically Non -Significant Curvivor-Metavivor Difference in Resilient Spiritual Connection Change Pre-Post Program

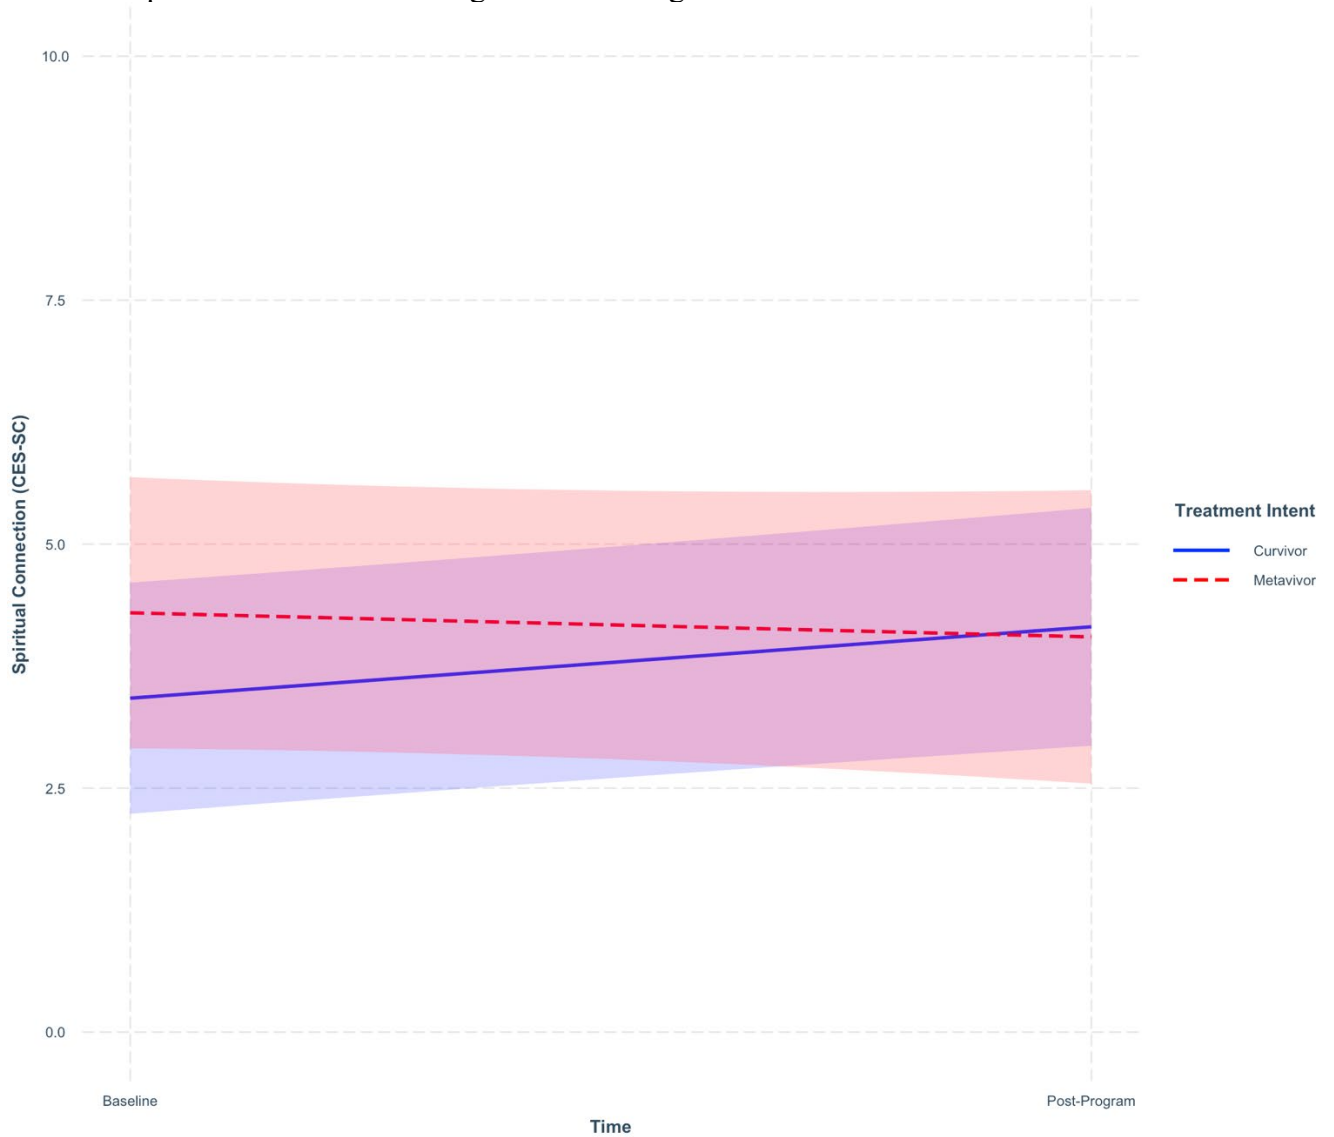

Notes. Shaded areas represent 95% confidence intervals for simple slopes. Possible scores on CES-SC subscale range from 0-10.

Supplementary Figure 7. Plot of Statistically Non-Significant Curvivor-Metavivor Difference in Anxiety Change Pre-Post Program

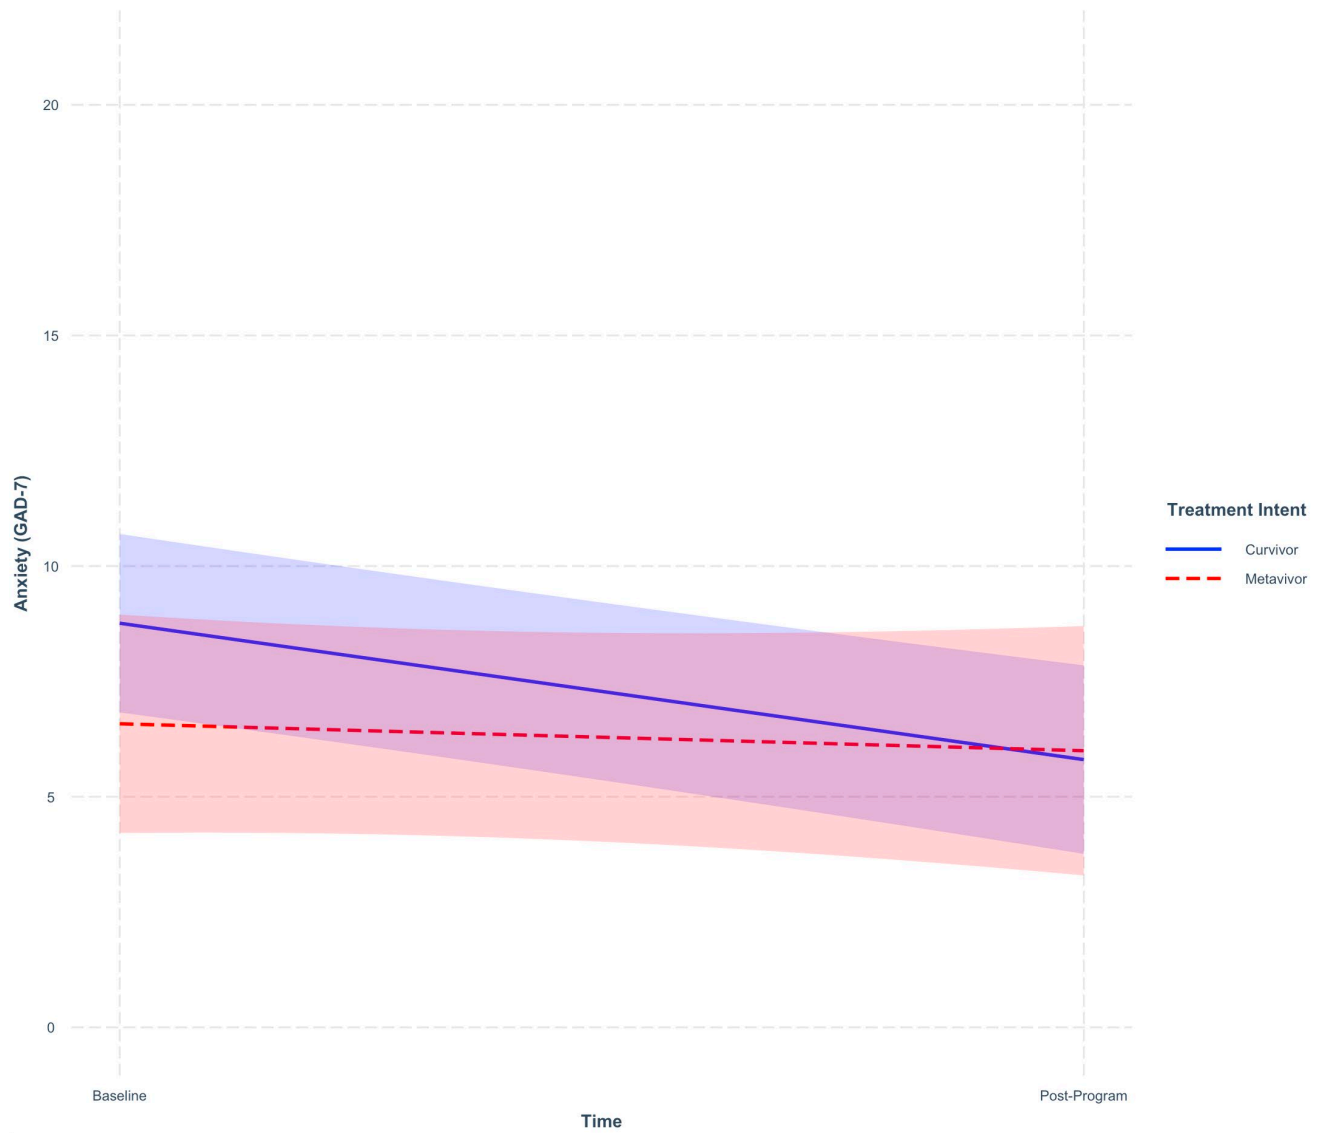

Notes. Shaded areas represent 95% confidence intervals for simple slopes. Possible scores on GAD-7 range from 0-21.



Supplementary Figure 8. Plot of Statistically Non-Significant Curvivor-Metavivor Difference in Worry Change Pre-Post Program

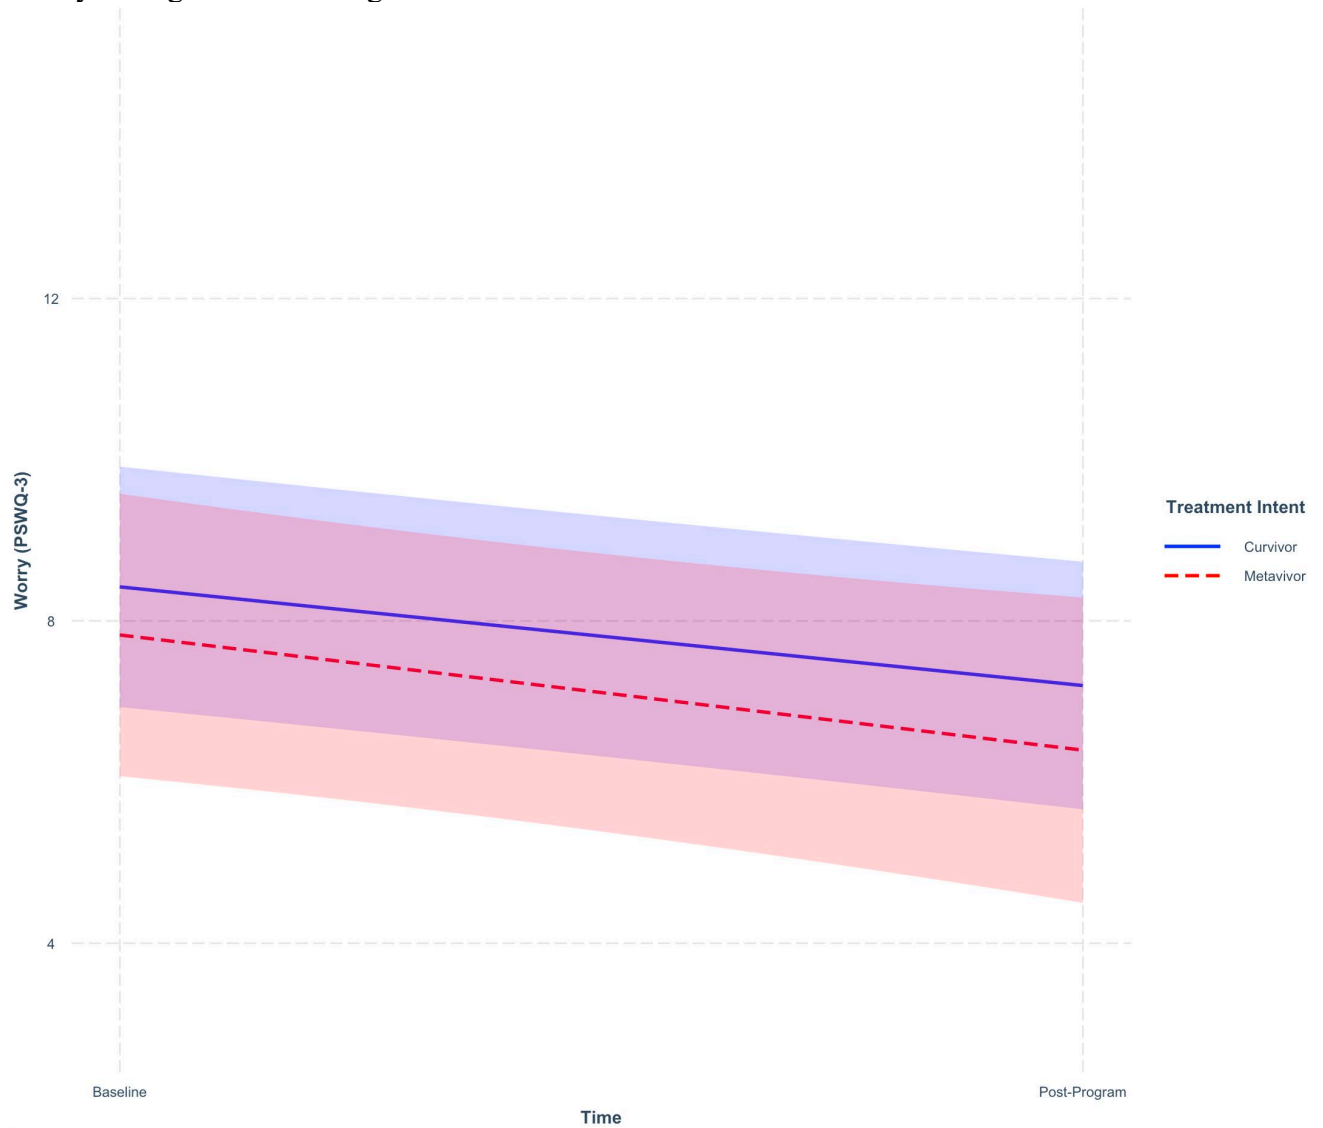

Notes. Shaded areas represent 95% confidence intervals for simple slopes. Possible scores on PSWQ-3 range from 3-15.
